# Supplementary material for: Factors Associated with Burnout among Resident Physicians Responding to the COVID-19 Pandemic: A 2-Month Longitudinal Observation Study
Source: Int J Environ Res Public Health. 2022 Aug 7;19(15):9714. doi: 10.3390/ijerph19159714 (PMC9367700; doi:10.3390/ijerph19159714)
Supplement: Supplementary file 1 [file ijerph-19-09714-s001.zip › ijerph-1851092-supplementary.pdf]

# Survey Assessing Burnout Over Time

**Demographic and professional questions – included only on initial survey**

**Q1 Sex:**

- ☐ Female ☐ Male  
☐ Other, please specify \_\_\_\_\_

**Q2 Age: Choose the range.**

- ☐ ≤35 years ☐ 50 – 59 years of age  
☐ 35-50 years of age ☐ 60 + years of age

**Q3 Race/ethnicity: (according to Census 2020)**

- |                                                        |                                                              |
|--------------------------------------------------------|--------------------------------------------------------------|
| <input type="radio"/> American Indian or Alaska Native | <input type="radio"/> Native Hawaiian                        |
| <input type="radio"/> Asian Indian                     | <input type="radio"/> Other Asian, please specify            |
| <input type="radio"/> Black or African American        | <input type="radio"/> Other Pacific Islander, please specify |
| <input type="radio"/> Chamorro                         | <input type="radio"/> Samoan                                 |
| <input type="radio"/> Chinese                          | <input type="radio"/> Some other race, please                |
| <input type="radio"/> Filipino                         | specify _____                                                |
| <input type="radio"/> Japanese                         | <input type="radio"/> Vietnamese                             |
| <input type="radio"/> Korean                           | <input type="radio"/> White                                  |

**Q4 Are you Hispanic, Latinx or of Spanish origin? (according to Census 2020)**

- ☐ Yes ☐ No

**Q5 Please select your professional role:**

- |                                           |                                      |
|-------------------------------------------|--------------------------------------|
| <input type="radio"/> Attending Physician | <input type="radio"/> Resident PGY1  |
| <input type="radio"/> Fellow              | <input type="radio"/> Resident PGY2  |
| <input type="radio"/> Nurse               | <input type="radio"/> Resident PGY3  |
| <input type="radio"/> Nurse Practitioner  | <input type="radio"/> Resident PGY 4 |
| <input type="radio"/> Physician Assistant | <input type="radio"/> Resident PGY 5 |

**Q6 How long have you been practicing (in years)?**

\_\_\_\_ ☐ currently in training

☐ 1-5 years,

☐ 6-10 years,

☐ 11-19 years

☐ 20 + \_\_\_\_\_

**Q7 Select your department:**

☐ Medicine - pulmonary critical care

☐ Medicine - General Medicine

☐ Medicine - any internal medicine subspecialty

☐ Emergency medicine

☐ Surgery

☐ OBGYN

☐ Podiatry

☐ Dental or dental subspecialty

☐ Pediatrics

☐ Other\_\_\_\_\_

**Questions administered on every survey.**

**Q8 Have you worked in a clinical environment in the last 24 hours?**

☐ Yes

☐ No

**Q9 Are you currently working outside your usual scope of practice or usual role?**

☐ Yes

☐ No

**Please reflect on how you are feeling today. How much do you disagree or agree with the following?**

|     |                                                                                | Strongly<br>Disagree  | Disagree              | Neither<br>Agree nor<br>Disagree | Agree                 | Strongly<br>Agree     |
|-----|--------------------------------------------------------------------------------|-----------------------|-----------------------|----------------------------------|-----------------------|-----------------------|
| Q10 | I have the energy to deal with the demands of work.                            | <input type="radio"/> | <input type="radio"/> | <input type="radio"/>            | <input type="radio"/> | <input type="radio"/> |
| Q11 | I feel focused and capable.                                                    | <input type="radio"/> | <input type="radio"/> | <input type="radio"/>            | <input type="radio"/> | <input type="radio"/> |
| Q12 | I can remain calm, despite the situation.                                      | <input type="radio"/> | <input type="radio"/> | <input type="radio"/>            | <input type="radio"/> | <input type="radio"/> |
| Q13 | I can take care of my own health and am sleeping and eating properly.          | <input type="radio"/> | <input type="radio"/> | <input type="radio"/>            | <input type="radio"/> | <input type="radio"/> |
| Q14 | The hospital is providing enough support and information to help me do my job. | <input type="radio"/> | <input type="radio"/> | <input type="radio"/>            | <input type="radio"/> | <input type="radio"/> |
| Q15 | The work I am doing is meaningful and will help us all address this crisis.    | <input type="radio"/> | <input type="radio"/> | <input type="radio"/>            | <input type="radio"/> | <input type="radio"/> |
| Q16 | I am learning and growing as a professional.                                   | <input type="radio"/> | <input type="radio"/> | <input type="radio"/>            | <input type="radio"/> | <input type="radio"/> |

**Q17 Overall, based on your definition of burnout, how would you rate your level of burnout?**

- ☐ I enjoy my work. I have no symptoms of burnout.
- ☐ Occasionally I am under stress, and I don't always have as much energy as I once did, but I don't feel burned out.
- ☐ I am definitely burning out and have one or more symptoms of burnout, such as physical and emotional exhaustion.
- ☐ The symptoms of burnout that I'm experiencing won't go away. I think about frustration at work a lot.
- ☐ I feel completely burned out and often wonder if I can go on. I am at the point where I may need some changes or may need to seek some sort of help.

**Question administered periodically (administered on first survey and every 4<sup>th</sup> survey)**

**Q18** Think about what you need to improve your well-being and performance. Check all that apply – Indicate the level of priority for those items that you choose.

|                                                         | Moderate<br>Priority  | High Priority         |
|---------------------------------------------------------|-----------------------|-----------------------|
| <b>Supplies and Personal Protective Equipment (PPE)</b> | <input type="radio"/> | <input type="radio"/> |
| <b>Mandated breaks</b>                                  | <input type="radio"/> | <input type="radio"/> |
| <b>Break spaces – for rest and food</b>                 | <input type="radio"/> | <input type="radio"/> |
| <b>Support and affirmation</b>                          | <input type="radio"/> | <input type="radio"/> |
| <b>Timely information</b>                               | <input type="radio"/> | <input type="radio"/> |
| <b>Mentorship and technical guidance</b>                | <input type="radio"/> | <input type="radio"/> |
| <b>Spiritual Support</b>                                | <input type="radio"/> | <input type="radio"/> |
| <b>Mental health resources</b>                          | <input type="radio"/> | <input type="radio"/> |

**Other**, please specify: \_\_\_\_\_
